# Supplementary material for: Cytotoxic Isopentenyl Phloroglucinol Compounds from Garcinia xanthochymus Using LC-MS-Based Metabolomics
Source: MDPI journal article supplement (doi:10.3390/metabo13020258), 2023-02-10
Supplement: s1 [file s1]

## Supplementary Material

### **Cytotoxic Isopentenyl Phloroglucinol Compounds from *Garcinia xanthochymus* Using LC-MS-Based Metabolomics**

Fan Quan, Xinbo Luan, Jian Zhang, Wenjie Gao, Jian Yan \* and Ping Li \*

*Key Laboratory of Agro-Environment in the Tropics, Ministry of Agriculture and Rural Affairs, Guang-dong Provincial Key Laboratory of Eco-Circular Agriculture, Guangdong Engineering Research Centre for Modern Eco-Agriculture, College of Natural Resources and Environment, South China Agricultural University, Guangzhou 510642, China*

**Table S1.** Metabolic compositions were putatively identified by UPLC-QTOF-MS and MSE analysis in *G. xanthochymus*.

| Peak NO. | Rt. (min) | MS molecular ions [M + H] <sup>+</sup> / [M-H] <sup>-</sup> |                                                 |      | MSE fragment ions |                                                 |      | Identification         | Class       | Plant Parts                    |
|----------|-----------|-------------------------------------------------------------|-------------------------------------------------|------|-------------------|-------------------------------------------------|------|------------------------|-------------|--------------------------------|
|          |           | <i>m/z</i>                                                  | M.F.                                            | ppm  | <i>m/z</i>        | M.F.                                            | ppm  | [Ref.]                 |             |                                |
| 1        | 0.656     | -                                                           | -                                               | -    | -                 | -                                               | -    | eucryphin [1]          | flavonoid   | leaf                           |
|          |           | 339.0726                                                    | C <sub>15</sub> H <sub>15</sub> O <sub>9</sub>  | 2.9  | -                 | -                                               | -    |                        |             |                                |
| 2        | 2.137     | -                                                           | -                                               | -    | -                 | -                                               | -    | unknown                |             | leaf                           |
|          |           | 549.2546                                                    | C <sub>25</sub> H <sub>41</sub> O <sub>13</sub> | -0.2 | 371.2073          | C <sub>19</sub> H <sub>31</sub> O <sub>7</sub>  | 0.8  |                        |             |                                |
| 3        | 2.200     | -                                                           | -                                               | -    | -                 | -                                               | -    | xanthochymusside [2]   | biflavonoid | leaf                           |
|          |           | 719.1609                                                    | C <sub>36</sub> H <sub>31</sub> O <sub>16</sub> | -0.4 | 593.1293          | C <sub>30</sub> H <sub>25</sub> O <sub>13</sub> | -0.3 |                        |             |                                |
|          |           |                                                             |                                                 |      | 431.0757          | C <sub>24</sub> H <sub>15</sub> O <sub>8</sub>  | -2.3 |                        |             |                                |
|          |           |                                                             |                                                 |      | 295.0246          | C <sub>16</sub> H <sub>7</sub> O <sub>6</sub>   | 1.0  |                        |             |                                |
| 4        | 2.269     | 719.1571                                                    | C <sub>36</sub> H <sub>31</sub> O <sub>16</sub> | -5.7 | 557.1080          | C <sub>30</sub> H <sub>21</sub> O <sub>11</sub> | -0.7 | fukugiside [3]         | biflavonoid | fruit, leaf, branch, stem bark |
|          |           |                                                             |                                                 |      | 431.0710          | C <sub>24</sub> H <sub>15</sub> O <sub>8</sub>  | 0.9  |                        |             |                                |
|          |           |                                                             |                                                 |      | 403.0826          | C <sub>23</sub> H <sub>15</sub> O <sub>7</sub>  | 2.0  |                        |             |                                |
|          |           | 717.1461                                                    | C <sub>36</sub> H <sub>29</sub> O <sub>16</sub> | 0.7  | 565.1332          | C <sub>29</sub> H <sub>25</sub> O <sub>12</sub> | -2.5 |                        |             |                                |
|          |           |                                                             |                                                 |      | 429.0600          | C <sub>24</sub> H <sub>13</sub> O <sub>8</sub>  | -2.3 |                        |             |                                |
| 5        | 2.435     | 721.1726                                                    | C <sub>36</sub> H <sub>33</sub> O <sub>16</sub> | -6   | -                 | -                                               | -    | xanthochymusside [2]   | biflavonoid | leaf                           |
|          |           | 719.1605                                                    | C <sub>36</sub> H <sub>31</sub> O <sub>16</sub> | -1   | 593.1277          | C <sub>30</sub> H <sub>25</sub> O <sub>13</sub> | -3   |                        |             |                                |
|          |           |                                                             |                                                 |      | 431.0753          | C <sub>24</sub> H <sub>15</sub> O <sub>8</sub>  | -3.2 |                        |             |                                |
|          |           |                                                             |                                                 |      | 295.0243          | C <sub>16</sub> H <sub>7</sub> O <sub>6</sub>   | 0.0  |                        |             |                                |
| 6        | 2.469     | 575.1177                                                    | C <sub>30</sub> H <sub>23</sub> O <sub>12</sub> | -2.3 | 431.0762          | C <sub>24</sub> H <sub>15</sub> O <sub>8</sub>  | -1.2 | buchananiflavanone [4] | biflavonoid | leaf                           |
|          |           |                                                             |                                                 |      | 403.0818          | C <sub>23</sub> H <sub>15</sub> O <sub>7</sub>  | 0.0  |                        |             |                                |
|          |           |                                                             |                                                 |      | 297.0412          | C <sub>16</sub> H <sub>9</sub> O <sub>6</sub>   | 4.4  |                        |             |                                |
|          |           | 573.1037                                                    | C <sub>30</sub> H <sub>21</sub> O <sub>12</sub> | 0.7  | 447.0706          | C <sub>24</sub> H <sub>15</sub> O <sub>9</sub>  | 0.2  |                        |             |                                |
|          |           |                                                             |                                                 |      | 429.0603          | C <sub>24</sub> H <sub>13</sub> O <sub>8</sub>  | -2.3 |                        |             |                                |
|          |           |                                                             |                                                 |      | 295.0240          | C <sub>16</sub> H <sub>7</sub> O <sub>6</sub>   | -1.0 |                        |             |                                |
| 7        | 2.653     | 559.1230                                                    | C <sub>30</sub> H <sub>23</sub> O <sub>11</sub> | -1.8 | -                 | -                                               | -    | GB-2a or its isomers   | biflavonoid | leaf                           |

| Peak NO. | Rt. (min) | MS molecular ions [M + H] <sup>+</sup> / [M-H] <sup>-</sup> |                                                 |      | MSE fragment ions |                                                 |      | Identification [Ref.]   | Class       | Plant Parts                          |
|----------|-----------|-------------------------------------------------------------|-------------------------------------------------|------|-------------------|-------------------------------------------------|------|-------------------------|-------------|--------------------------------------|
|          |           | <i>m/z</i>                                                  | M.F.                                            | ppm  | <i>m/z</i>        | M.F.                                            | ppm  |                         |             |                                      |
| 8        | 2.734     | 557.1085                                                    | C <sub>30</sub> H <sub>21</sub> O <sub>11</sub> | 0.2  | 447.0728          | C <sub>24</sub> H <sub>15</sub> O <sub>9</sub>  | 2.7  | [2]                     | biflavonoid | fruit, leaf, branch, stem bark, seed |
|          |           |                                                             |                                                 |      | 429.0606          | C <sub>24</sub> H <sub>13</sub> O <sub>8</sub>  | -0.9 |                         |             |                                      |
|          |           | 557.1075                                                    | C <sub>30</sub> H <sub>21</sub> O <sub>11</sub> | -1.6 | 539.0980          | C <sub>30</sub> H <sub>19</sub> O <sub>10</sub> | 0.4  | fukugetin [5] or        |             |                                      |
|          |           |                                                             |                                                 |      | 431.0771          | C <sub>24</sub> H <sub>15</sub> O <sub>8</sub>  | 0.9  | morelloflavone [6]      |             |                                      |
|          |           |                                                             |                                                 |      | 403.0822          | C <sub>23</sub> H <sub>15</sub> O <sub>7</sub>  | 1.0  |                         |             |                                      |
|          |           | 555.0930                                                    | C <sub>30</sub> H <sub>19</sub> O <sub>11</sub> | 0.5  | 429.0601          | C <sub>24</sub> H <sub>13</sub> O <sub>8</sub>  | -2.1 |                         |             |                                      |
| 9        | 2.751     |                                                             |                                                 |      | 401.0679          | C <sub>23</sub> H <sub>13</sub> O <sub>7</sub>  | 4.5  |                         | biflavonoid | leaf                                 |
|          |           |                                                             |                                                 |      | 295.0238          | C <sub>16</sub> H <sub>7</sub> O <sub>6</sub>   | -1.7 |                         |             |                                      |
|          |           | 559.1226                                                    | C <sub>30</sub> H <sub>23</sub> O <sub>11</sub> | -2.5 | -                 | -                                               | -    | GB-1 or its isomers [7] |             |                                      |
|          |           | 557.1077                                                    | C <sub>30</sub> H <sub>21</sub> O <sub>11</sub> | -1.3 | 429.0597          | C <sub>24</sub> H <sub>13</sub> O <sub>8</sub>  | -2.1 |                         |             |                                      |
|          |           |                                                             |                                                 |      | 401.0652          | C <sub>23</sub> H <sub>13</sub> O <sub>7</sub>  | -2.2 |                         |             |                                      |
| 10       | 2.917     |                                                             |                                                 |      | 295.0240          | C <sub>16</sub> H <sub>7</sub> O <sub>6</sub>   | -0.3 |                         | biflavonoid | leaf, branch                         |
|          |           | 543.1270                                                    | C <sub>30</sub> H <sub>23</sub> O <sub>10</sub> | -3.9 | 415.0827          | C <sub>24</sub> H <sub>15</sub> O <sub>7</sub>  | 2.2  | GB 1a [3]               |             |                                      |
|          |           |                                                             |                                                 |      | 387.0878          | C <sub>23</sub> H <sub>15</sub> O <sub>6</sub>  | 2.3  |                         |             |                                      |
|          |           |                                                             |                                                 |      | 297.0409          | C <sub>16</sub> H <sub>9</sub> O <sub>6</sub>   | 3.4  |                         |             |                                      |
|          |           | 541.1129                                                    | C <sub>30</sub> H <sub>21</sub> O <sub>10</sub> | -1.1 | 413.0654          | C <sub>24</sub> H <sub>13</sub> O <sub>7</sub>  | -4.4 |                         |             |                                      |
|          |           |                                                             |                                                 |      | 385.0700          | C <sub>23</sub> H <sub>13</sub> O <sub>6</sub>  | -3.6 |                         |             |                                      |
| 11       | 2.917     |                                                             |                                                 |      | 295.0241          | C <sub>16</sub> H <sub>7</sub> O <sub>6</sub>   | -1.9 |                         | biflavonoid | stem bark, seed                      |
|          |           | 541.1126                                                    | C <sub>30</sub> H <sub>21</sub> O <sub>10</sub> | -1.7 | 415.0827          | C <sub>24</sub> H <sub>15</sub> O <sub>7</sub>  | 3.9  | volkensiflavone [8]     |             |                                      |
|          |           |                                                             |                                                 |      | 387.0882          | C <sub>23</sub> H <sub>15</sub> O <sub>6</sub>  | 1.3  |                         |             |                                      |
|          |           | 539.0979                                                    | C <sub>30</sub> H <sub>19</sub> O <sub>10</sub> | 0.2  | 429.0598          | C <sub>24</sub> H <sub>13</sub> O <sub>8</sub>  | -2.8 |                         |             |                                      |
|          |           |                                                             |                                                 |      | 413.0652          | C <sub>24</sub> H <sub>13</sub> O <sub>7</sub>  | -2.2 |                         |             |                                      |
|          |           |                                                             |                                                 |      | 385.0706          | C <sub>23</sub> H <sub>13</sub> O <sub>6</sub>  | -1.6 |                         |             |                                      |
|          |           |                                                             |                                                 |      | 295.0241          | C <sub>16</sub> H <sub>7</sub> O <sub>6</sub>   | -0.7 |                         |             |                                      |
|          |           |                                                             |                                                 |      | 267.0829          | C <sub>15</sub> H <sub>7</sub> O <sub>5</sub>   | -1.5 |                         |             |                                      |

| Peaks | Rt.   | MS molecular ions [M + H] <sup>+</sup> / [M-H] <sup>-</sup> |                                                 |      | MSE fragment ions |                                                 |      | Identification                  | Class        | Plant Parts            |
|-------|-------|-------------------------------------------------------------|-------------------------------------------------|------|-------------------|-------------------------------------------------|------|---------------------------------|--------------|------------------------|
| NO.   | (min) | m/z                                                         | M.F.                                            | ppm  | m/z               | M.F.                                            | ppm  | [Ref.]                          |              |                        |
| 12    | 2.969 | 539.0970                                                    | C <sub>30</sub> H <sub>19</sub> O <sub>10</sub> | -1.5 | 415.0821          | C <sub>24</sub> H <sub>15</sub> O <sub>7</sub>  | 0.7  | amentoflavone [9]               | biflavonoid  | leaf                   |
|       |       |                                                             |                                                 |      | 387.0879          | C <sub>23</sub> H <sub>15</sub> O <sub>6</sub>  | 2.6  |                                 |              |                        |
|       |       | 537.0814                                                    | C <sub>30</sub> H <sub>17</sub> O <sub>10</sub> | -1.5 | 443.0392          | C <sub>24</sub> H <sub>11</sub> O <sub>9</sub>  | -2.5 |                                 |              |                        |
| 13    | 3.382 | 553.1123                                                    | C <sub>31</sub> H <sub>21</sub> O <sub>10</sub> | -2.2 | 431.0752          | C <sub>24</sub> H <sub>15</sub> O <sub>8</sub>  | -3.5 | sotetsuflavone [10]             | biflavonoid  | leaf, branch           |
|       |       |                                                             |                                                 |      | 403.0445          | C <sub>22</sub> H <sub>11</sub> O <sub>8</sub>  | -2.2 |                                 |              |                        |
|       |       | 551.0977                                                    | C <sub>31</sub> H <sub>19</sub> O <sub>10</sub> | -0.2 | 429.0602          | C <sub>24</sub> H <sub>13</sub> O <sub>8</sub>  | -1.9 |                                 |              |                        |
|       |       |                                                             |                                                 |      | 331.0621          | C <sub>20</sub> H <sub>11</sub> O <sub>5</sub>  | 4.5  |                                 |              |                        |
| 14    | 3.450 | -                                                           | -                                               | -    | -                 | -                                               | -    | -                               | xanthone     | stem bark              |
|       |       | 669.1609                                                    | C <sub>36</sub> H <sub>29</sub> O <sub>13</sub> | 0.1  | 409.1281          | C <sub>23</sub> H <sub>21</sub> O <sub>7</sub>  | -1.5 |                                 |              |                        |
|       |       |                                                             |                                                 |      | 391.1173          | C <sub>23</sub> H <sub>19</sub> O <sub>6</sub>  | -2.3 |                                 |              |                        |
|       |       |                                                             |                                                 |      | 259.0242          | C <sub>13</sub> H <sub>7</sub> O <sub>6</sub>   | -0.4 |                                 |              |                        |
| 15    | 3.548 | 595.1428                                                    | C <sub>30</sub> H <sub>27</sub> O <sub>13</sub> | -4   | -                 | -                                               | -    | tiliroside [11]                 | flavonoid    | leaf                   |
|       |       | 593.1274                                                    | C <sub>30</sub> H <sub>25</sub> O <sub>13</sub> | -3.5 | -                 | -                                               | -    |                                 |              |                        |
| 16    | 3.668 | 311.1869                                                    | C <sub>17</sub> H <sub>27</sub> O <sub>5</sub>  | 3.5  | -                 | -                                               | -    | unknown                         |              | fruit, branch, stem    |
|       |       | 309.1717                                                    | C <sub>17</sub> H <sub>25</sub> O <sub>5</sub>  | 4.9  | -                 | -                                               | -    |                                 |              | bark                   |
| 17    | 3.864 | 295.1918                                                    | C <sub>17</sub> H <sub>27</sub> O <sub>4</sub>  | 3    | -                 | -                                               | -    | tanacetol A [12]                | benzophenone | fruit, leaf, stem bark |
|       |       | 293.1763                                                    | C <sub>17</sub> H <sub>25</sub> O <sub>4</sub>  | 3.4  | -                 | -                                               | -    |                                 |              |                        |
| 18    | 3.864 | 339.1250                                                    | C <sub>20</sub> H <sub>19</sub> O <sub>5</sub>  | 5.3  | 283.0621          | C <sub>16</sub> H <sub>11</sub> O <sub>5</sub>  | 5.3  | 6-prenylapigenin [13]           | flavonoid    | stem bark              |
|       |       | 337.1085                                                    | C <sub>20</sub> H <sub>17</sub> O <sub>5</sub>  | 2.7  | 293.0445          | C <sub>17</sub> H <sub>9</sub> O <sub>5</sub>   | -1.7 |                                 |              |                        |
|       |       |                                                             |                                                 |      | 281.0456          | C <sub>16</sub> H <sub>9</sub> O <sub>5</sub>   | 2.1  |                                 |              |                        |
| 19    | 4.064 | 343.1182                                                    | C <sub>19</sub> H <sub>19</sub> O <sub>6</sub>  | 5.8  | 287.0569          | C <sub>15</sub> H <sub>11</sub> O <sub>6</sub>  | 4.5  | 9H-xanthen-9-one, 1,4,          | xanthone     | stem bark              |
|       |       |                                                             |                                                 |      | 215.0346          | C <sub>12</sub> H <sub>7</sub> O <sub>4</sub>   | 0.9  | 6-trihydroxy-5-methoxy          |              |                        |
|       |       | 341.1033                                                    | C <sub>19</sub> H <sub>17</sub> O <sub>6</sub>  | 2.3  | 285.0399          | C <sub>15</sub> H <sub>9</sub> O <sub>6</sub>   | 0    | -7-(3-methyl-2-buten-1-yl)-[14] |              |                        |
| 20    | 4.099 | 653.1633                                                    | C <sub>36</sub> H <sub>29</sub> O <sub>12</sub> | -3.2 | 597.1015          | C <sub>32</sub> H <sub>21</sub> O <sub>12</sub> | -3   | garmoxanthone                   | xanthone     | stem bark              |

| Peaks<br>NO. | Rt.<br>(min) | MS molecular ions [M + H] <sup>+</sup> / [M-H] <sup>-</sup> |                                                 |      | MSE fragment ions |                                                   |      | Identification<br>[Ref.] | Class           | Plant Parts                       |
|--------------|--------------|-------------------------------------------------------------|-------------------------------------------------|------|-------------------|---------------------------------------------------|------|--------------------------|-----------------|-----------------------------------|
|              |              | <i>m/z</i>                                                  | M.F.                                            | ppm  | <i>m/z</i>        | M.F.                                              | ppm  |                          |                 |                                   |
|              |              | 651.1494                                                    | C <sub>36</sub> H <sub>27</sub> O <sub>12</sub> | -1.4 | 391.1173          | C <sub>23</sub> H <sub>19</sub> O <sub>6</sub>    | -2.3 | [15]                     |                 |                                   |
|              |              |                                                             |                                                 |      | 259.0240          | C <sub>13</sub> H <sub>7</sub> O <sub>6</sub>     | -1.2 |                          |                 |                                   |
| 21           | 5.028        | -                                                           | -                                               | -    | -                 | -                                                 | -    | unknown                  |                 | fruit, leaf, branch,<br>stem bark |
|              |              | 311.1691                                                    | C <sub>13</sub> H <sub>27</sub> O <sub>8</sub>  | -4.8 | -                 | -                                                 | -    |                          |                 |                                   |
| 22           | 5.080        | 301.1430                                                    | C <sub>18</sub> H <sub>21</sub> O <sub>4</sub>  | -3.3 | -                 | -                                                 | -    | bractebiphenyl B [16]    | biphenyl        | fruit, leaf, branch,<br>stem bark |
|              |              | -                                                           | -                                               | -    | -                 | -                                                 | -    |                          |                 |                                   |
| 23           | 5.212        | 535.3640                                                    | C <sub>31</sub> H <sub>51</sub> O <sub>7</sub>  | 0.9  | 557.3443          | C <sub>31</sub> H <sub>50</sub> O <sub>7</sub> Na | -2.0 | unknown                  |                 | seed                              |
|              |              |                                                             |                                                 |      | 359.2241          | C <sub>22</sub> H <sub>31</sub> O <sub>4</sub>    | 5.3  |                          |                 |                                   |
|              |              |                                                             |                                                 |      | 301.1427          | C <sub>18</sub> H <sub>21</sub> O <sub>4</sub>    | -4.3 |                          |                 |                                   |
|              |              |                                                             |                                                 |      | 227.2026          | C <sub>14</sub> H <sub>27</sub> O <sub>2</sub>    | 6.6  |                          |                 |                                   |
|              |              | 533.3484                                                    | C <sub>31</sub> H <sub>49</sub> O <sub>7</sub>  | 1.1  | 501.3204          | C <sub>30</sub> H <sub>45</sub> O <sub>6</sub>    | -2.4 |                          |                 |                                   |
|              |              |                                                             |                                                 |      | 421.2219          | C <sub>23</sub> H <sub>33</sub> O <sub>7</sub>    | -1.7 |                          |                 |                                   |
| 24           | 5.332        | 417.2656                                                    | C <sub>25</sub> H <sub>37</sub> O <sub>5</sub>  | 3.6  | 439.2458          | C <sub>25</sub> H <sub>36</sub> O <sub>5</sub> Na | -0.2 | garcinielliptone HC or   | benzofurandio   | seed                              |
|              |              |                                                             |                                                 |      | 329.1763          | C <sub>20</sub> H <sub>25</sub> O <sub>4</sub>    | 3.0  | garcinielliptone HD      | ne              |                                   |
|              |              |                                                             |                                                 |      | 301.1424          | C <sub>18</sub> H <sub>21</sub> O <sub>4</sub>    | -5.3 | [17]                     |                 |                                   |
|              |              |                                                             |                                                 |      | 275.1300          | C <sub>16</sub> H <sub>19</sub> O <sub>4</sub>    | 6.2  |                          |                 |                                   |
|              |              |                                                             |                                                 |      | 257.1180          | C <sub>16</sub> H <sub>17</sub> O <sub>3</sub>    | 0.8  |                          |                 |                                   |
|              |              | 415.2493                                                    | C <sub>25</sub> H <sub>35</sub> O <sub>5</sub>  | 2.2  | 345.1709          | C <sub>20</sub> H <sub>25</sub> O <sub>5</sub>    | 2    |                          |                 |                                   |
|              |              |                                                             |                                                 |      | 303.1236          | C <sub>17</sub> H <sub>19</sub> O <sub>5</sub>    | 1.3  |                          |                 |                                   |
|              |              |                                                             |                                                 |      | 287.1289          | C <sub>17</sub> H <sub>19</sub> O <sub>4</sub>    | 2.1  |                          |                 |                                   |
|              |              |                                                             |                                                 |      | 219.0660          | C <sub>12</sub> H <sub>11</sub> O <sub>4</sub>    | 1.4  |                          |                 |                                   |
| 25           | 5.613        | 517.3531                                                    | C <sub>31</sub> H <sub>49</sub> O <sub>6</sub>  | 0.4  | 539.3344          | C <sub>31</sub> H <sub>48</sub> O <sub>6</sub> Na | -0.9 | Garcihombronane L        | friedolanostane | seed                              |
|              |              |                                                             |                                                 |      | 359.2239          | C <sub>22</sub> H <sub>31</sub> O <sub>4</sub>    | 4.7  | [18]                     |                 |                                   |
|              |              |                                                             |                                                 |      | 291.1612          | C <sub>17</sub> H <sub>23</sub> O <sub>4</sub>    | 5.5  |                          |                 |                                   |

| Peaks | Rt.   | MS molecular ions [M + H] <sup>+</sup> / [M-H] <sup>-</sup> |                                                 |     | MSE fragment ions |                                                   |      | Identification                                                                  | Class           | Plant Parts              |
|-------|-------|-------------------------------------------------------------|-------------------------------------------------|-----|-------------------|---------------------------------------------------|------|---------------------------------------------------------------------------------|-----------------|--------------------------|
| NO.   | (min) | m/z                                                         | M.F.                                            | ppm | m/z               | M.F.                                              | ppm  | [Ref.]                                                                          |                 |                          |
| 26    | 5.746 | 515.3381                                                    | C <sub>31</sub> H <sub>47</sub> O <sub>6</sub>  | 1.6 | 403.2114          | C <sub>23</sub> H <sub>31</sub> O <sub>6</sub>    | -1.7 | unknown                                                                         |                 | seed                     |
|       |       |                                                             |                                                 |     | 289.1443          | C <sub>17</sub> H <sub>21</sub> O <sub>4</sub>    | 1.0  |                                                                                 |                 |                          |
|       |       |                                                             |                                                 |     | 221.0819          | C <sub>12</sub> H <sub>13</sub> O <sub>4</sub>    | 2.3  |                                                                                 |                 |                          |
|       |       | 431.2810                                                    | C <sub>26</sub> H <sub>39</sub> O <sub>5</sub>  | 3   | 453.2633          | C <sub>26</sub> H <sub>38</sub> O <sub>5</sub> Na | 3.5  |                                                                                 |                 |                          |
|       |       | 429.2654                                                    | C <sub>26</sub> H <sub>37</sub> O <sub>5</sub>  | 3   | 317.1391          | C <sub>18</sub> H <sub>21</sub> O <sub>5</sub>    | 0.6  |                                                                                 |                 |                          |
|       |       |                                                             |                                                 |     | 301.1445          | C <sub>18</sub> H <sub>21</sub> O <sub>4</sub>    | 1.7  |                                                                                 |                 |                          |
| 27    | 5.963 |                                                             |                                                 |     | 233.0817          | C <sub>13</sub> H <sub>13</sub> O <sub>4</sub>    | 1.3  | garcinixanthone E [19]                                                          | xanthone        | stem bark                |
|       |       | 465.2289                                                    | C <sub>28</sub> H <sub>33</sub> O <sub>6</sub>  | 2.6 | 409.1667          | C <sub>24</sub> H <sub>25</sub> O <sub>6</sub>    | 3.9  |                                                                                 |                 |                          |
|       |       |                                                             |                                                 |     | 353.1041          | C <sub>20</sub> H <sub>17</sub> O <sub>6</sub>    | 4.5  |                                                                                 |                 |                          |
|       |       |                                                             |                                                 |     | 311.0562          | C <sub>17</sub> H <sub>11</sub> O <sub>6</sub>    | 1.9  |                                                                                 |                 |                          |
|       |       | 463.2126                                                    | C <sub>28</sub> H <sub>31</sub> O <sub>6</sub>  | 1.1 | 407.1485          | C <sub>24</sub> H <sub>23</sub> O <sub>6</sub>    | -2.5 |                                                                                 |                 |                          |
|       |       |                                                             |                                                 |     | 365.1017          | C <sub>21</sub> H <sub>17</sub> O <sub>6</sub>    | -2.2 |                                                                                 |                 |                          |
| 28    | 6.027 | 523.2562                                                    | C <sub>27</sub> H <sub>39</sub> O <sub>10</sub> | 3.6 | 479.2293          | C <sub>25</sub> H <sub>35</sub> O <sub>9</sub>    | 2.5  | unknown                                                                         |                 | fruit, branch, stem bark |
|       |       |                                                             |                                                 |     | 435.2028          | C <sub>23</sub> H <sub>31</sub> O <sub>8</sub>    | 2.1  |                                                                                 |                 |                          |
|       |       |                                                             |                                                 |     | 301.2417          | C <sub>18</sub> H <sub>21</sub> O <sub>4</sub>    | -4.3 |                                                                                 |                 |                          |
|       |       | -                                                           | -                                               | -   | -                 | -                                                 | -    |                                                                                 |                 |                          |
| 29    | 6.095 | 485.2914                                                    | C <sub>29</sub> H <sub>41</sub> O <sub>6</sub>  | 2.3 | 507.2731          | C <sub>29</sub> H <sub>40</sub> O <sub>6</sub> Na | 1.6  | 9H-Xanthen-9-one, 1,3-dihydroxy-7-methoxy-2,8-bis(3-methylbutyl)-6-(pentyloxy)- | xanthone        | fruit, branch, stem bark |
|       |       | -                                                           | -                                               | -   | -                 | -                                                 | -    |                                                                                 |                 |                          |
| 30    | 6.526 | 517.3532                                                    | C <sub>31</sub> H <sub>49</sub> O <sub>6</sub>  | 0.6 | 539.3342          | C <sub>31</sub> H <sub>48</sub> O <sub>6</sub> Na | -1.3 | garcihombronane L [18]                                                          | friedolanostane | seed                     |
|       |       |                                                             |                                                 |     | 375.2182          | C <sub>22</sub> H <sub>31</sub> O <sub>5</sub>    | 2.9  |                                                                                 |                 |                          |
|       |       |                                                             |                                                 |     | 291.1610          | C <sub>17</sub> H <sub>23</sub> O <sub>4</sub>    | 4.8  |                                                                                 |                 |                          |
|       |       |                                                             |                                                 |     | 219.1032          | C <sub>13</sub> H <sub>15</sub> O <sub>3</sub>    | 5.0  |                                                                                 |                 |                          |

| Peaks<br>NO. | Rt.<br>(min) | MS molecular ions [M + H] <sup>+</sup> / [M-H] <sup>-</sup> |                                                |     | MSE fragment ions |                                                    |      | Identification<br>[Ref.]                                                                                                                                                        | Class          | Plant Parts        |
|--------------|--------------|-------------------------------------------------------------|------------------------------------------------|-----|-------------------|----------------------------------------------------|------|---------------------------------------------------------------------------------------------------------------------------------------------------------------------------------|----------------|--------------------|
|              |              | <i>m/z</i>                                                  | M.F.                                           | ppm | <i>m/z</i>        | M.F.                                               | ppm  |                                                                                                                                                                                 |                |                    |
| 31           | 6.595        | 515.3384                                                    | C <sub>31</sub> H <sub>47</sub> O <sub>6</sub> | 2.1 | 403.2116          | C <sub>23</sub> H <sub>31</sub> O <sub>6</sub>     | -1.2 | garciosaterpene E or its<br>isomers [20]                                                                                                                                        |                | seed               |
|              |              |                                                             |                                                |     | 289.1446          | C <sub>17</sub> H <sub>21</sub> O <sub>4</sub>     | 2.1  |                                                                                                                                                                                 |                |                    |
|              |              |                                                             |                                                |     | 247.0977          | C <sub>14</sub> H <sub>15</sub> O <sub>4</sub>     | 2.8  |                                                                                                                                                                                 |                |                    |
|              |              | 487.3430                                                    | C <sub>30</sub> H <sub>47</sub> O <sub>5</sub> | 1.4 | 509.3241          | C <sub>30</sub> H <sub>46</sub> O <sub>5</sub> Na  | -0.4 |                                                                                                                                                                                 |                |                    |
|              |              |                                                             |                                                |     | 363.2181          | C <sub>21</sub> H <sub>31</sub> O <sub>5</sub>     | 2.8  |                                                                                                                                                                                 |                |                    |
|              |              |                                                             |                                                |     | 277.1455          | C <sub>17</sub> H <sub>23</sub> O <sub>3</sub>     | 2.9  |                                                                                                                                                                                 |                |                    |
|              |              |                                                             |                                                |     | 219.1034          | C <sub>13</sub> H <sub>15</sub> O <sub>3</sub>     | 5.9  |                                                                                                                                                                                 |                |                    |
|              |              | 485.3279                                                    | C <sub>30</sub> H <sub>45</sub> O <sub>5</sub> | 2.5 | 373.2012          | C <sub>22</sub> H <sub>29</sub> O <sub>5</sub>     | -0.8 |                                                                                                                                                                                 |                |                    |
|              |              |                                                             |                                                |     | 275.1290          | C <sub>16</sub> H <sub>19</sub> O <sub>4</sub>     | 2.5  |                                                                                                                                                                                 |                |                    |
|              |              |                                                             |                                                |     | 233.0820          | C <sub>13</sub> H <sub>13</sub> O <sub>4</sub>     | 2.6  |                                                                                                                                                                                 |                |                    |
| 32           | 6.628        | 503.3373                                                    | C <sub>30</sub> H <sub>47</sub> O <sub>6</sub> | 0   | -                 | -                                                  | -    | garcinielliptone E [21]                                                                                                                                                         | triterpenoid   | leaf, branch, seed |
|              |              | 501.3220                                                    | C <sub>30</sub> H <sub>45</sub> O <sub>6</sub> | 0.8 | 389.1955          | C <sub>22</sub> H <sub>29</sub> O <sub>6</sub>     | -2.3 |                                                                                                                                                                                 |                |                    |
|              |              |                                                             |                                                |     | 275.1284          | C <sub>16</sub> H <sub>19</sub> O <sub>4</sub>     | 0.4  |                                                                                                                                                                                 |                |                    |
|              |              |                                                             |                                                |     | 233.0810          | C <sub>13</sub> H <sub>13</sub> O <sub>4</sub>     | -1.7 |                                                                                                                                                                                 |                |                    |
| 33           | 6.646        | 503.3378                                                    | C <sub>30</sub> H <sub>47</sub> O <sub>6</sub> | 1   | 525.3163          | C <sub>30</sub> H <sub>46</sub> O <sub>6</sub> Na  | -5.5 | garcinielliptone C [22]                                                                                                                                                         | phloroglucinol | seed               |
|              |              | 501.3222                                                    | C <sub>30</sub> H <sub>45</sub> O <sub>6</sub> | 1.2 | 347.1860          | C <sub>20</sub> H <sub>27</sub> O <sub>5</sub>     | 0.6  |                                                                                                                                                                                 |                |                    |
|              |              |                                                             |                                                |     | 289.1444          | C <sub>17</sub> H <sub>21</sub> O <sub>4</sub>     | 1.4  |                                                                                                                                                                                 |                |                    |
| 34           | 6.692        | 515.3376                                                    | C <sub>31</sub> H <sub>47</sub> O <sub>6</sub> | 0.6 | 537.3181          | C <sub>31</sub> H <sub>46</sub> O <sub>6</sub> NaC | -2   | cholesta-8(14),24-dien-<br>26-oic acid, 9,23-<br>dihydroxy-4,4,17-<br>trimethyl-3,15-dioxo-,<br>methyl ester, (5 $\alpha$ ,13 $\alpha$ ,<br>17 $\alpha$ ,23R,24E)-(9CI)<br>[23] | phloroglucinol | seed               |
|              |              |                                                             |                                                |     | 343.1928          | C <sub>21</sub> H <sub>27</sub> O <sub>4</sub>     | 5.5  |                                                                                                                                                                                 |                |                    |
|              |              |                                                             |                                                |     | 325.1813          | C <sub>21</sub> H <sub>25</sub> O <sub>3</sub>     | 2.8  |                                                                                                                                                                                 |                |                    |
|              |              |                                                             |                                                |     | 271.1345          | C <sub>17</sub> H <sub>19</sub> O <sub>3</sub>     | 4.1  |                                                                                                                                                                                 |                |                    |
|              |              | 513.3221                                                    | C <sub>31</sub> H <sub>45</sub> O <sub>6</sub> | 1   | 485.3255          | C <sub>30</sub> H <sub>45</sub> O <sub>5</sub>     | -2.5 |                                                                                                                                                                                 |                |                    |
|              |              |                                                             |                                                |     | 359.1856          | C <sub>21</sub> H <sub>27</sub> O <sub>5</sub>     | -0.6 |                                                                                                                                                                                 |                |                    |
|              |              |                                                             |                                                |     | 289.1443          | C <sub>17</sub> H <sub>21</sub> O <sub>4</sub>     | 1.0  |                                                                                                                                                                                 |                |                    |
| 35           | 6.744        | 465.2286                                                    | C <sub>28</sub> H <sub>33</sub> O <sub>6</sub> | 1.9 | -                 | -                                                  | -    | isogarciniaxanthone E                                                                                                                                                           | xanthone       | stem bark          |

| Peaks<br>NO. | Rt.<br>(min) | MS molecular ions [M + H] <sup>+</sup> / [M-H] <sup>-</sup> |                                                |      | MSE fragment ions |                                                   |      | Identification<br>[Ref.] | Class           | Plant Parts             |
|--------------|--------------|-------------------------------------------------------------|------------------------------------------------|------|-------------------|---------------------------------------------------|------|--------------------------|-----------------|-------------------------|
|              |              | <i>m/z</i>                                                  | M.F.                                           | ppm  | <i>m/z</i>        | M.F.                                              | ppm  |                          |                 |                         |
|              |              | 463.2128                                                    | C <sub>28</sub> H <sub>31</sub> O <sub>6</sub> | 1.5  | 351.0858          | C <sub>20</sub> H <sub>15</sub> O <sub>6</sub>    | -3.1 | [24]                     |                 |                         |
|              |              |                                                             |                                                |      | 323.0550          | C <sub>18</sub> H <sub>11</sub> O <sub>6</sub>    | -1.9 |                          |                 |                         |
| 36           | 6.944        | 485.3291                                                    | C <sub>30</sub> H <sub>45</sub> O <sub>5</sub> | 4.9  | 507.3085          | C <sub>30</sub> H <sub>44</sub> O <sub>5</sub> Na | -0.2 | garcinielliptone L [25]  | phloroglucinol  | seed                    |
|              |              | 483.3117                                                    | C <sub>30</sub> H <sub>43</sub> O <sub>5</sub> | 1.4  | 415.2477          | C <sub>25</sub> H <sub>35</sub> O <sub>5</sub>    | -1.7 | or garsubelline A [26]   |                 |                         |
|              |              |                                                             |                                                |      | 355.1906          | C <sub>22</sub> H <sub>27</sub> O <sub>4</sub>    | -0.8 |                          |                 |                         |
|              |              |                                                             |                                                |      | 287.1285          | C <sub>17</sub> H <sub>19</sub> O <sub>4</sub>    | 0.7  |                          |                 |                         |
|              |              |                                                             |                                                |      | 259.0974          | C <sub>15</sub> H <sub>15</sub> O <sub>4</sub>    | 1.5  |                          |                 |                         |
| 37           | 6.996        | 485.3223                                                    | C <sub>30</sub> H <sub>45</sub> O <sub>5</sub> | -9.1 | -                 | -                                                 | -    | garcinielliptone F [27]  | phloroglucinol  | fruit, leaf, branch,    |
|              |              | 483.3112                                                    | C <sub>30</sub> H <sub>43</sub> O <sub>5</sub> | 1.2  | 329.1752          | C <sub>20</sub> H <sub>25</sub> O <sub>4</sub>    | -0.3 |                          |                 | stem bark, seed         |
|              |              |                                                             |                                                |      | 287.1291          | C <sub>17</sub> H <sub>19</sub> O <sub>4</sub>    | 2.8  |                          |                 |                         |
|              |              |                                                             |                                                |      | 219.0658          | C <sub>12</sub> H <sub>11</sub> O <sub>4</sub>    | 0.5  |                          |                 |                         |
| 38           | 7.191        | 501.3572                                                    | C <sub>31</sub> H <sub>49</sub> O <sub>5</sub> | -1.6 | -                 | -                                                 | -    | garcinielliptone D [25]  | phloroglucinol  | fruit, seed             |
|              |              | 499.3426                                                    | C <sub>31</sub> H <sub>47</sub> O <sub>5</sub> | 0.6  | 361.2006          | C <sub>21</sub> H <sub>29</sub> O <sub>5</sub>    | -2.5 |                          |                 |                         |
|              |              |                                                             |                                                |      | 289.1443          | C <sub>17</sub> H <sub>21</sub> O <sub>4</sub>    | 1.0  |                          |                 |                         |
| 39           | 7.294        | 517.3530                                                    | C <sub>31</sub> H <sub>49</sub> O <sub>6</sub> | 0.2  | 539.3336          | C <sub>31</sub> H <sub>48</sub> O <sub>6</sub> Na | -2.4 | garcihombronane L        | friedolanostane | leaf, branch, stem bark |
|              |              |                                                             |                                                |      | 375.2172          | C <sub>22</sub> H <sub>31</sub> O <sub>5</sub>    | 0.3  | [18]                     |                 |                         |
|              |              |                                                             |                                                |      | 291.1611          | C <sub>17</sub> H <sub>23</sub> O <sub>4</sub>    | 5.2  |                          |                 |                         |
|              |              | 515.3376                                                    | C <sub>31</sub> H <sub>47</sub> O <sub>6</sub> | 0.6  | 403.2110          | C <sub>23</sub> H <sub>31</sub> O <sub>6</sub>    | -2.7 |                          |                 |                         |
|              |              |                                                             |                                                |      | 289.1440          | C <sub>17</sub> H <sub>21</sub> O <sub>4</sub>    | 0.0  |                          |                 |                         |
|              |              |                                                             |                                                |      | 247.0969          | C <sub>14</sub> H <sub>15</sub> O <sub>4</sub>    | -0.4 |                          |                 |                         |
| 40           | 7.478        | 499.3422                                                    | C <sub>31</sub> H <sub>47</sub> O <sub>5</sub> | -0.2 | -                 | -                                                 | -    | garcinielliptone T [18]  | phloroglucinol  | fruit, leaf, branch,    |
|              |              | 497.3266                                                    | C <sub>31</sub> H <sub>45</sub> O <sub>5</sub> | -0.2 | 343.1904          | C <sub>21</sub> H <sub>27</sub> O <sub>4</sub>    | -1.5 |                          |                 | stem bark, seed         |
|              |              |                                                             |                                                |      | 301.1440          | C <sub>18</sub> H <sub>21</sub> O <sub>4</sub>    | 0.0  |                          |                 |                         |
| 41           | 7.558        | 499.3433                                                    | C <sub>31</sub> H <sub>47</sub> O <sub>5</sub> | 2    | 521.3253          | C <sub>31</sub> H <sub>46</sub> O <sub>5</sub> Na | 1.9  | garsubellin B [28]       | phloroglucinol  | stem bark, seed         |
|              |              |                                                             |                                                |      | 359.2243          | C <sub>22</sub> H <sub>31</sub> O <sub>4</sub>    | 5.8  |                          |                 |                         |



[illegible]

## References of Table S1

1. Yoshimura, M.; Ninomiya, K.; Tagashira, Y.; Maejima, K.; Yoshida, T.; Amakura, Y. Polyphenolic Constituents of the Pericarp of Mangosteen (*Garcinia Mangostana* L.). *J. Agric. Food. Chem.* **2015**, 65, 7670–7674.
2. Li, Y.; Chen, Y.; Xiao, C.; Chen, D.; Xiao, Y.; Mei, Z. Rapid Screening and Identification of  $\alpha$ -Amylase Inhibitors from *Garcinia Xanthochymus* Using Enzyme-Immobilized Magnetic Nanoparticles Coupled with HPLC and MS. *J. Chromatogr. B.* **2014**, 960, 166–173.
3. Pandey, R.; Chandra, P.; Kumar, B. G. Y. C.; Srivastva, M.; Anu Aravind, A. P.; Shameer, P. S.; Rameshkumar, K. B. Simultaneous Determination of Multi-Class Bioactive Constituents for Quality Assessment of *Garcinia* Species Using UHPLC-QQQLIT-MS/MS. *Ind. Crop. Prod.* **2015**, 77, 861–872.
4. Aemail, T. D. S. C.; Ranner, J.; Stiglbauer, B.; Weiss, P.; Stark, S.; Balemba, O. B.; Hofmann, T. Construction and Application of a Database for a Five-Dimensional Identification of Natural Compounds in *Garcinia* Species by Means of UPLC-ESI-TWIMS-TOF-MS: Introducing Gas Phase Polyphenol Conformer Drift Time Distribution Intensity Ratios. *J. Agric. Food. Chem.* **2019**, 67, 975–985.
5. Chen, Y.; Gan, F.; Jin, S.; Liu, H.; Wu, S. J.; Yang, W. T.; Yang, G. Z. Adamantyl Derivatives and Rearranged Benzophenones from *Garcinia Xanthochymus* Fruits. *RSC. Adv.* **2017**, 7, 17289–17296.
6. Aravind, A. P. A.; Pandey, R.; Kumar, B.; Asha, K. R. T.; Rameshkumar, K. B. Phytochemical Screening of *Garcinia Travancorica* by Hplc-Esi-Qtof Mass Spectrometry and Cytotoxicity Studies of the Major Biflavonoid Fukugiside. *Nat. Prod. Commun.* **2016**, 11, 1839–1842.
7. Baslas, R. K.; Kumar, P. Chemical Examination of the Fruits of *Garcinia Xanthochymus*. *Curr. Sci.* **1979**, 48, 814–815.
8. Liu, L.; Li, Y. F.; Gan, F.; Yang, G. Z.; Chen, Y. Chemical Constituents from Leaves of *Garcinia Xanthochymus*. *China J. Chin. Mater. Med.* **2016**, 41, 2098–2104.
9. Li, P.; Yue, G. G. L.; Kwok, H. F.; Long, C. L.; Lau, C. B. S.; Kennelly, E. J. Using Ultra-Performance Liquid Chromatography Quadrupole Time of Flight Mass Spectrometry-Based Chemometrics for the Identification of Anti-Angiogenic Biflavonoids from Edible *Garcinia* Species. *J. Agric. Food. Chem.* **2017**, 65, 8348–8355.
10. Parveen, N.; Singh, M. P.; Khan, N. U.; Logani, M. K. Flavonoidic Constituents of *Garcinia Xanthochymus* Leaves. *Fitoterapia* **1994**, 65, 89.
11. Quan, G. H.; Oh, S. R.; Kim, J. H.; Lee, H. K.; Kinghorn, A. D.; Chin, Y. W. Xanthone Constituents of the Fruits of *Garcinia Mangostana* with Anticomplement Activity. *Phytother. Res.* **2010**, 24, 1575–1577.
12. Shiekh, K. A.; Benjakul, S.; Sae-Leaw, T. Effect of Chamuang (*Garcinia Cowa* Roxb.) Leaf Extract on Inhibition of Melanosis and Quality Changes of Pacific White Shrimp During Refrigerated Storage. *Food. Chem.* **2019**, 270, 554–561.
13. Han, Q. B.; Qiao, C. F.; Song, J. Z.; Yang, N. Y.; Cao, X. W.; Peng, Y.; Yang, D. J.; Chen, S. L.; Xu, H. X. Cytotoxic Prenylated Phenolic

Compounds from the Twig Bark of *Garcinia Xanthochymus*. *Chem. Biodivers.* **2007**, 4, 940–946.

14. Song, J. L.; Gao, H.; Yuan, L.; Wang, Z. L. Study on the Chemical Constituents of *Garcinia Xanthochymus*. *J. Anhui. Agric. Sci.* **2015**, 43, 222–224.
15. Wang, W. Y.; Liao, Y. Y.; Huang, X. M.; Tang, C.; Cai, P. A Novel Xanthone Dimer Derivative with Antibacterial Activity Isolated from the Bark of *Garcinia Mangostana*. *Nat. Prod. Res.* **2018**, 32, 1769–1774.
16. Xu, X. M.; Shi, J. L.; Li, L.; Zhu, D. L.; Yu, Z. H.; Yu, W. L.; Zhou, M.; Hu, Q. F.; Guo, Y. D.; Lou, J. Biphenyls from the Twigs of *Garcinia Multiflora* and Their Antitobacco Mosaic Virus Activities. *Rec. Nat. Prod.* **2016**, 10, 566–571.
17. Lin, K. W.; Huang, A. M.; Tu, H. Y.; Weng, J. R.; Hour, T. C.; Wei, B. L.; Yang, S. C.; Wang, J. P.; Pu, Y. S.; Lin, C. N. Phloroglucinols Inhibit Chemical Mediators and Xanthine Oxidase, and Protect Cisplatin-Induced Cell Death by Reducing Reactive Oxygen Species in Normal Human Urothelial and Bladder Cancer Cells. *J. Agric. Food. Chem.* **2009**, 57, 8782–8787.
18. Klaiklay, S.; Sukpondma, Y.; Rukachaisirikul, V.; Phongpaichit, S. Friedolanostanes and Xanthenes from the Twigs of *Garcinia Hombroniana*. *Phytochemistry* **2013**, 85, 161–166.
19. Zhong, F. F.; Chen, Y.; Wang, P.; Feng, H. J.; Yang, G. Z. Xanthenes from the Bark of *Garcinia Xanthochymus* and Their 1,1-Diphenyl-2-Picrylhydrazyl Radical-Scavenging Activity. *Chinese. J. Chem.* **2009**, 27, 74–80.
20. Pailee, P. A.; Kruahong, T. B.; Hongthong, S. A.; Kuhakarn, C. A.; Jaipetch, T. A.; Pohmakotr, M. A.; Jariyawat, S. C.; Suksen, K. C.; Akkarawongsapat, R. D.; Limthongkul, J. D.; Panthong, A. E.; Kongsaree, P. A.; Prabpai, S. A.; Tuchinda, P. A.; Reutrakul, V. A. Cytotoxic, Anti-Hiv-1 and Anti-Inflammatory Activities of Lanostanes from Fruits of *Garcinia Speciosa*. *Phytochem. Lett.* **2017**, 20, 111–118.
21. Grossman, R. B.; Yang, X. W. Structural Revision of Garcinielliptin Oxide and Garcinielliptone E. *J. Nat. Prod.* **2020**, 83, 2041–2044.
22. Weng, J. R.; Lin, C. N.; Tsao, L. T.; Wang, J. P. Novel and Anti-Inflammatory Constituents of *Garcinia Subelliptica*. *Chem. Eur. J.* **2003**, 9, 1958–1963.
23. Vieira, L. M. M.; Kijjoa, A.; Wilairat, R.; Nascimento, M.; Gales, L.; Damas, A. M.; Silva, A. M. S.; Mondranondra, I. O.; Herz, W. Bioactive Friedolanostanes and 11(10→8)-Abeolanostanes from the Bark of *Garcinia Speciosa*. *J. Nat. Prod.* **2004**, 3, 2043–2047.
24. Ji, F.; Li, Z. L.; Niu, S. L.; Hua, H. M. Studies on the Chemical Constituents of the Barks of *Garcinia Xanthochymus*. *Chin. J. Med. Chem.* **2012**, 22, 507–510.
25. Weng, J. R.; Tsao, L. T.; Wang, J. P.; Wu, R. R.; Lin, C. N. Anti-Inflammatory Phloroglucinols and Terpenoids from *Garcinia Subelliptica*. *J. Nat. Prod.* **2004**, 67, 1796–1799.
26. Lin, K. W.; Huang, A. M.; Yang, S. C.; Weng, J. R.; Hour, T. C.; Pu, Y. S.; Lin, C. N. Cytotoxic and Antioxidant Constituents from *Garcinia*

*Subelliptica*. *Food. Chem.* **2012**, 135, 851-859.

27. Yun, Y. S.; Shioura, M.; Hitotsuyanagi, Y.; Yotsumoto, S.; Inoue, H. Garcinielliptone G from *Garcinia Subelliptica* Induces Apoptosis in Acute Leukemia Cells. *Molecules*. **2021**, 26, 2422.
28. Fukuyama, Y.; Minami, H.; Kuwayama, A. Garsubellins, Polyisoprenylated Phloroglucinol Derivatives from *Garcinia Subelliptica*. *Phytochemistry* **1998**, 49, 853-857.
29. Okoko, T. In Vitro Antioxidant and Free Radical Scavenging Activities of Garcinia Kola Seeds. *Food. Chem. Toxicol.* **2009**, 47, 2620-2623.

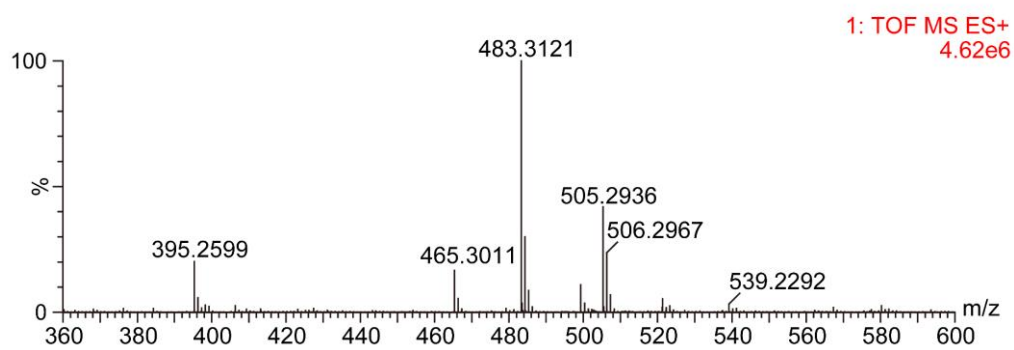

**Figure S1.** HR-ESI-MS spectrum for Garxanthochin A.

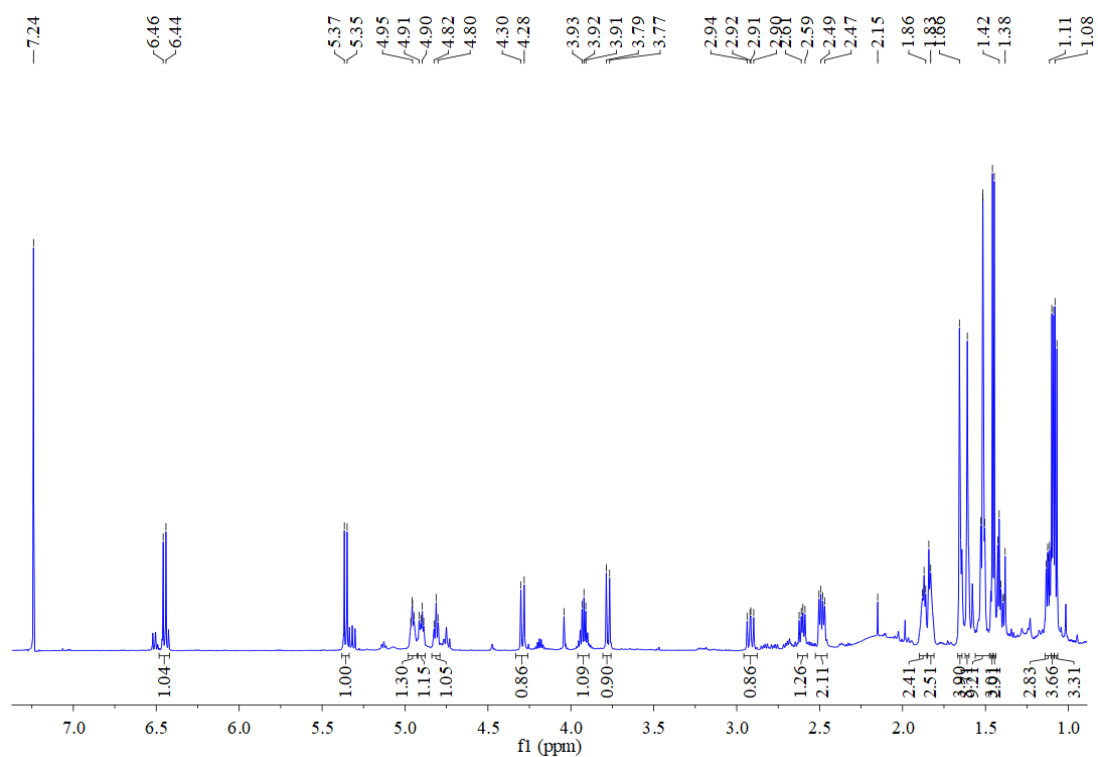

**Figure S2.**  $^1\text{H}$  NMR spectrum for Garxanthochin A in  $\text{CDCl}_3$  (600 MHz).

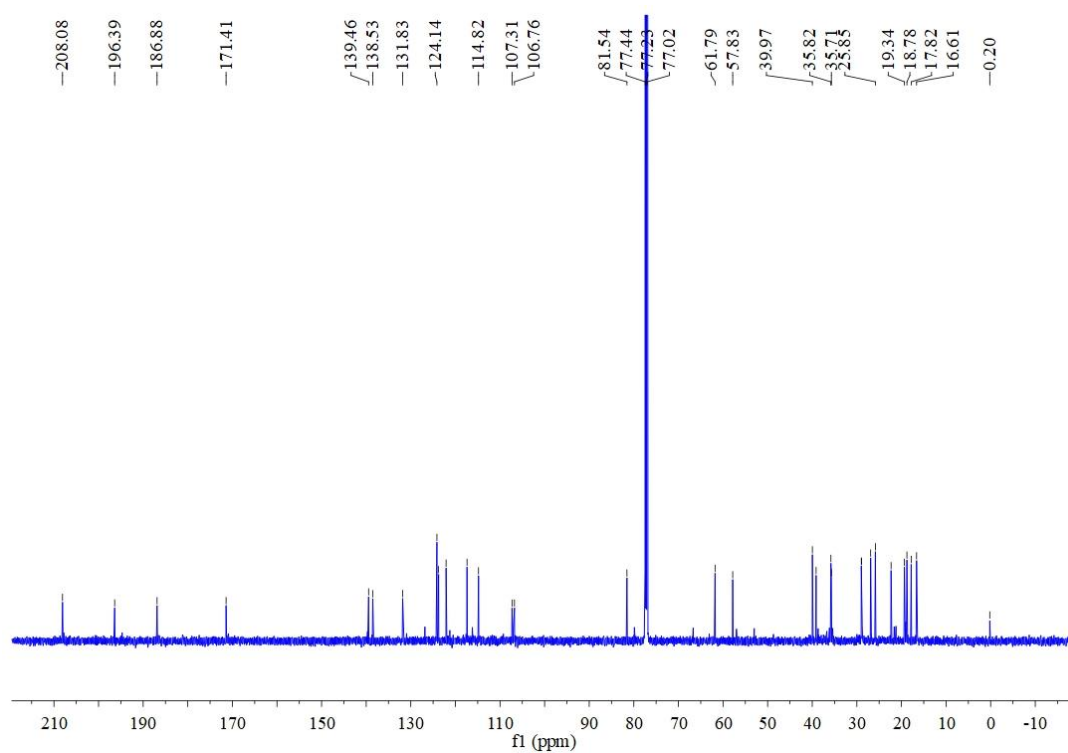

**Figure S3.**  $^{13}\text{C}$  NMR spectrum for Garxanthochin A in  $\text{CDCl}_3$  (150 MHz).

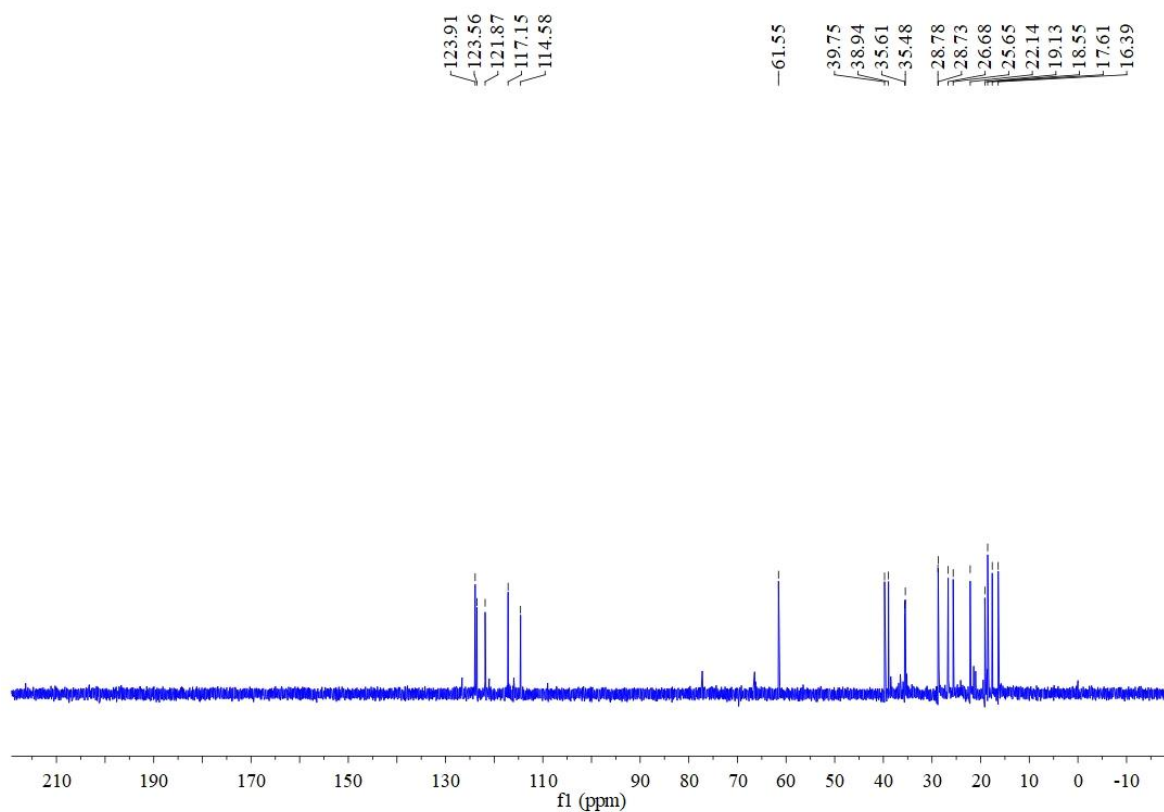

**Figure S4.** DEPT NMR spectrum for Garxanthochin A in  $\text{CDCl}_3$  (150 MHz).

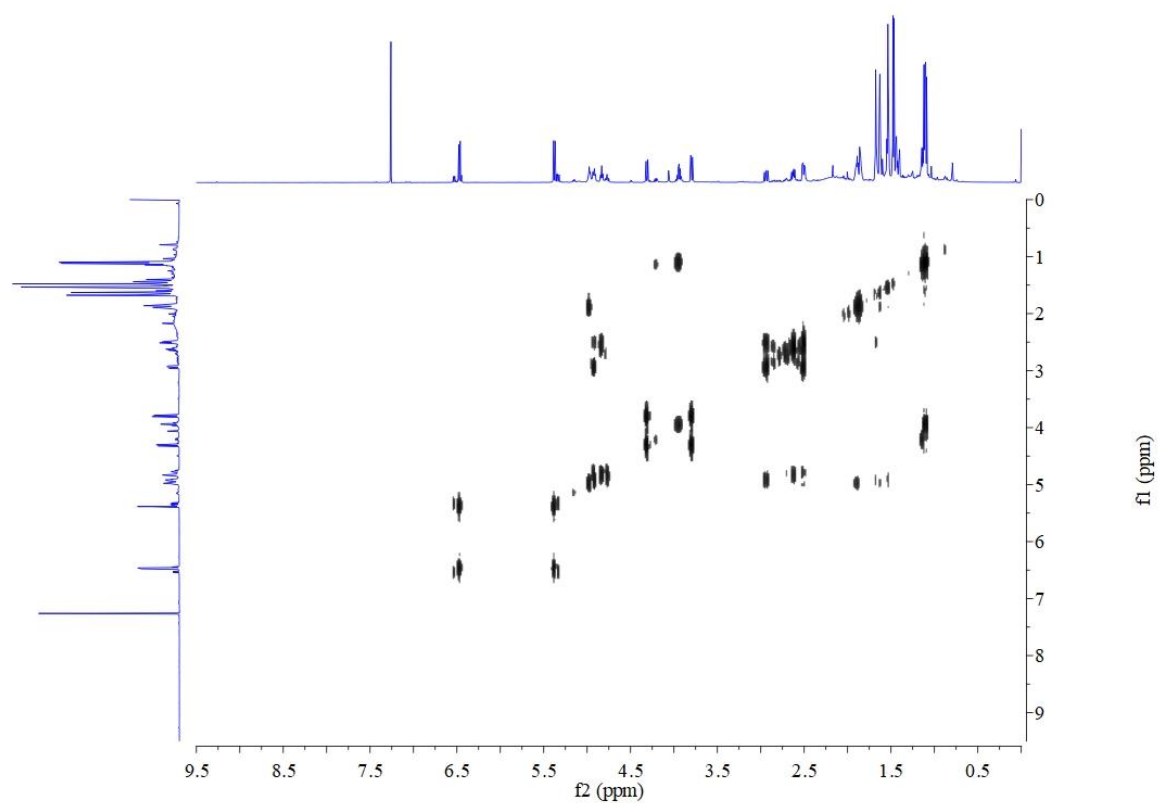

**Figure S5.**  $^1\text{H}$ - $^1\text{H}$  COSY spectrum for Garxanthochin A in  $\text{CDCl}_3$ .

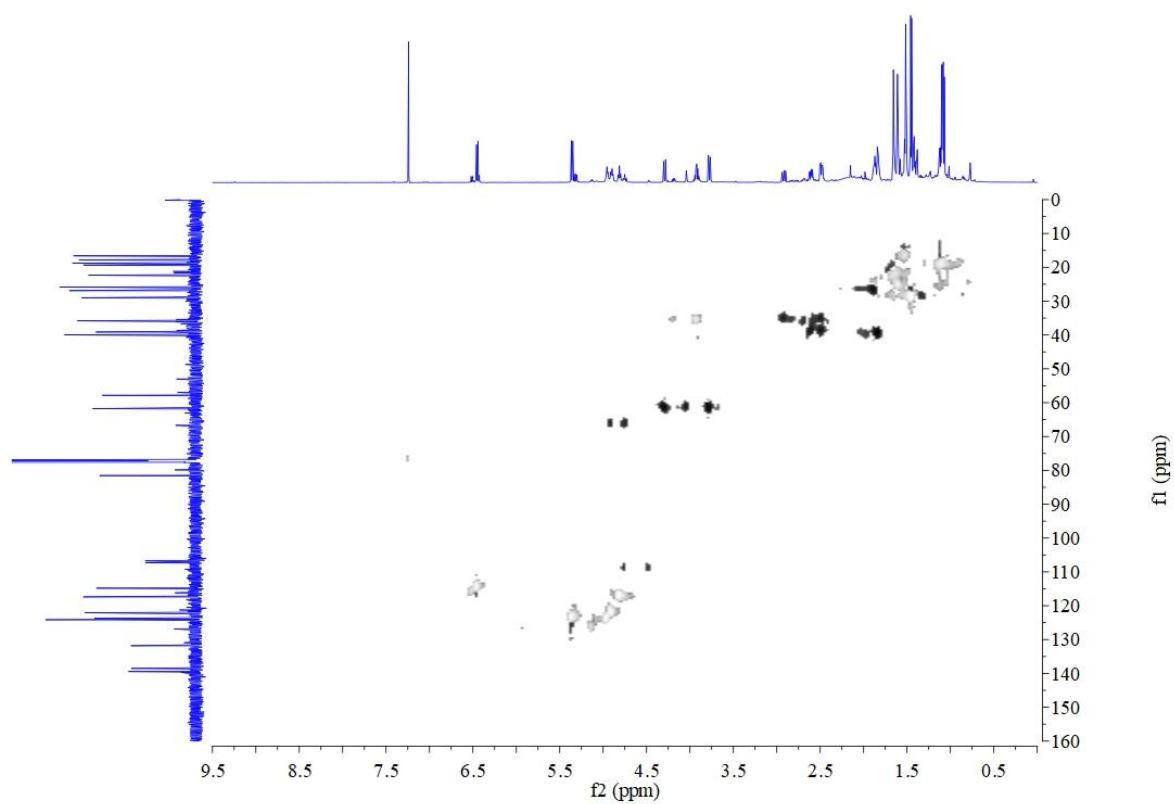

**Figure S6.** HMQC spectrum for Garxanthochin A in  $\text{CDCl}_3$ .

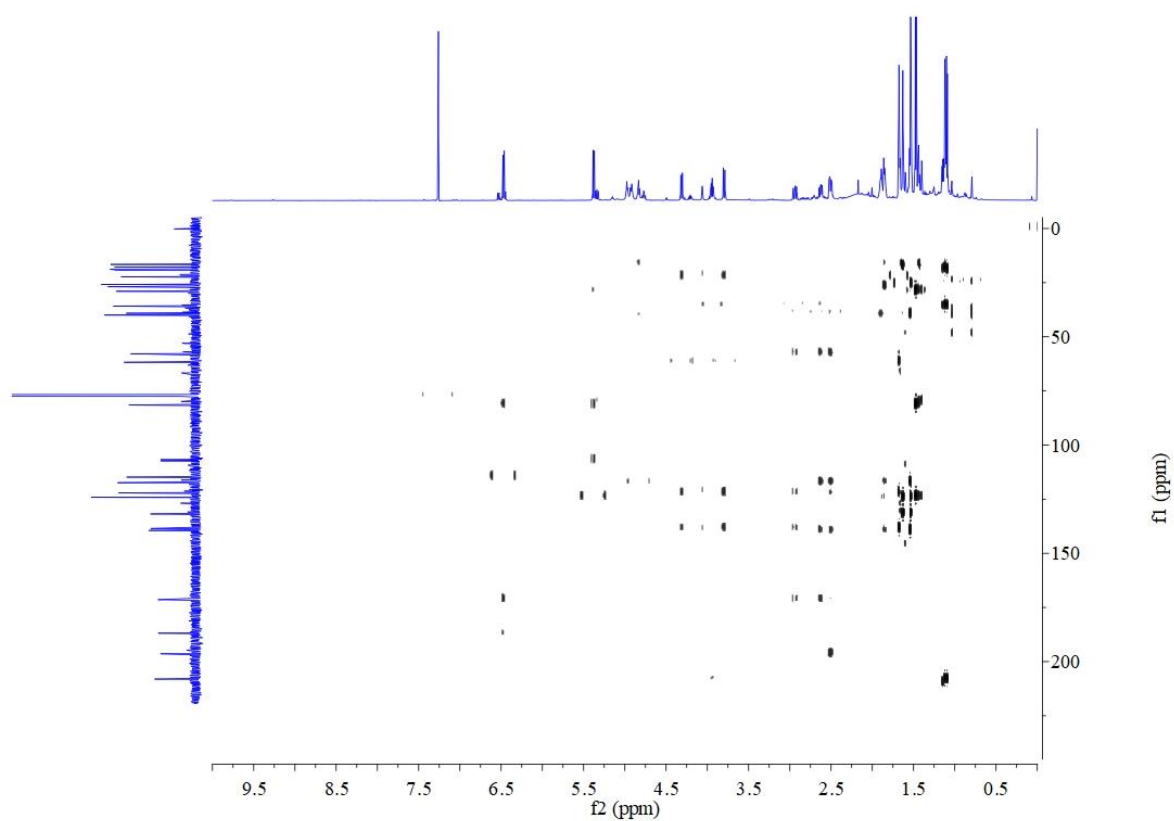

**Figure S7.** NOESY spectrum for Garxanthochin A in  $\text{CDCl}_3$ .

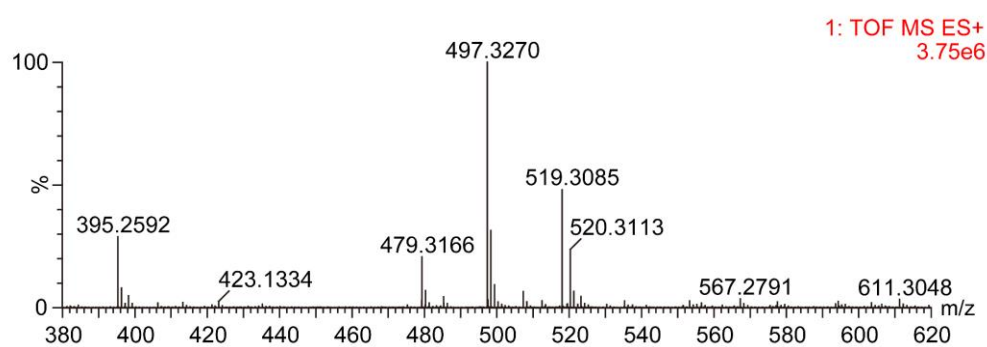

**Figure S8.** HR-ESI-MS spectrum for Garxanthochin B.



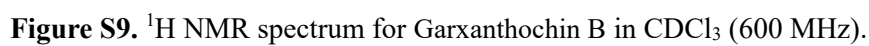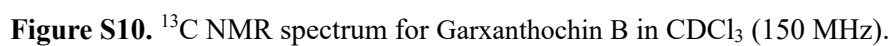

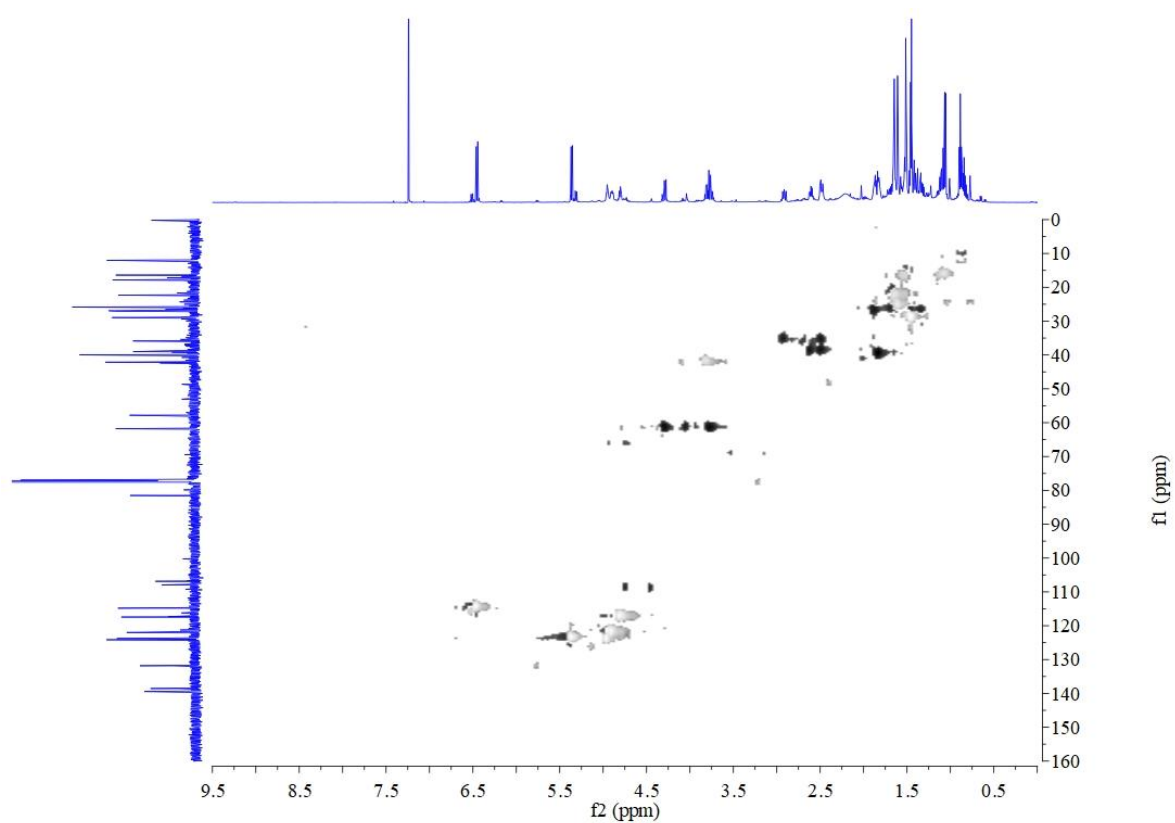

**Figure S11.** HMQC spectrum for Garxanthochin B in  $\text{CDCl}_3$ .

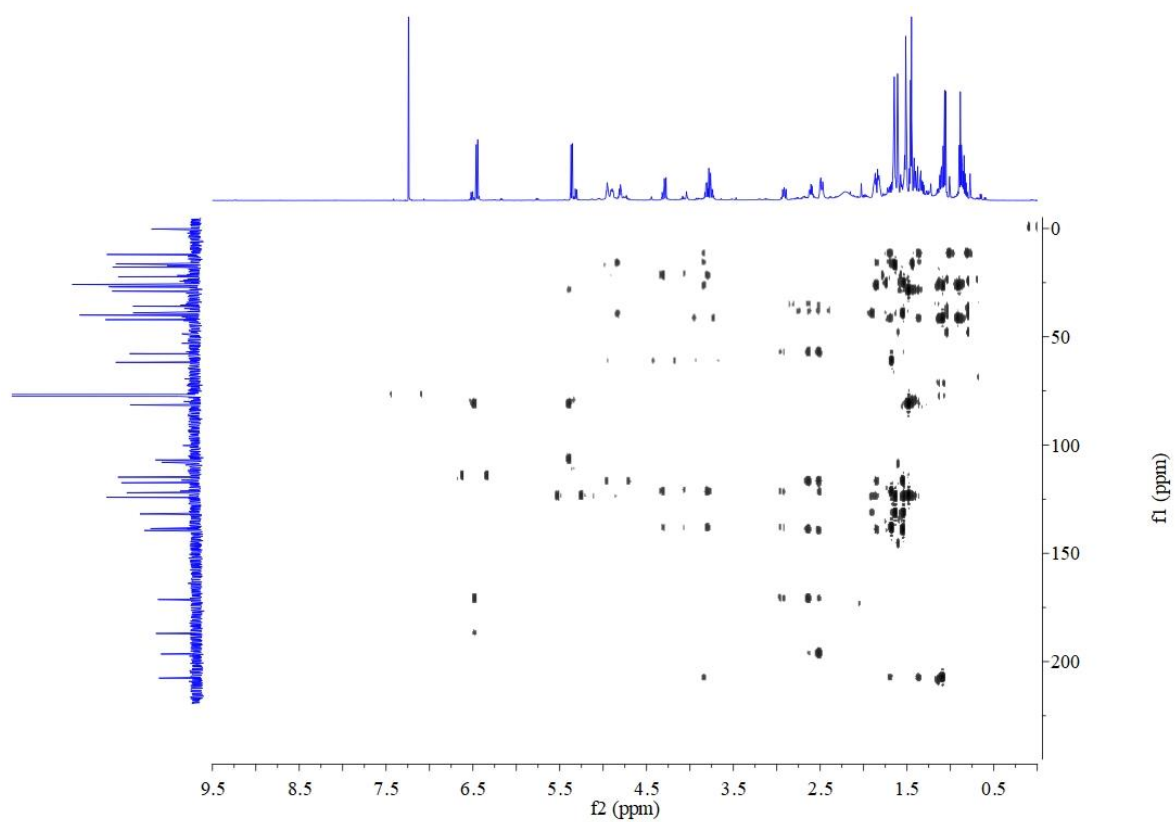

**Figure S12.** HMBC spectrum for Garxanthochin B in  $\text{CDCl}_3$ .

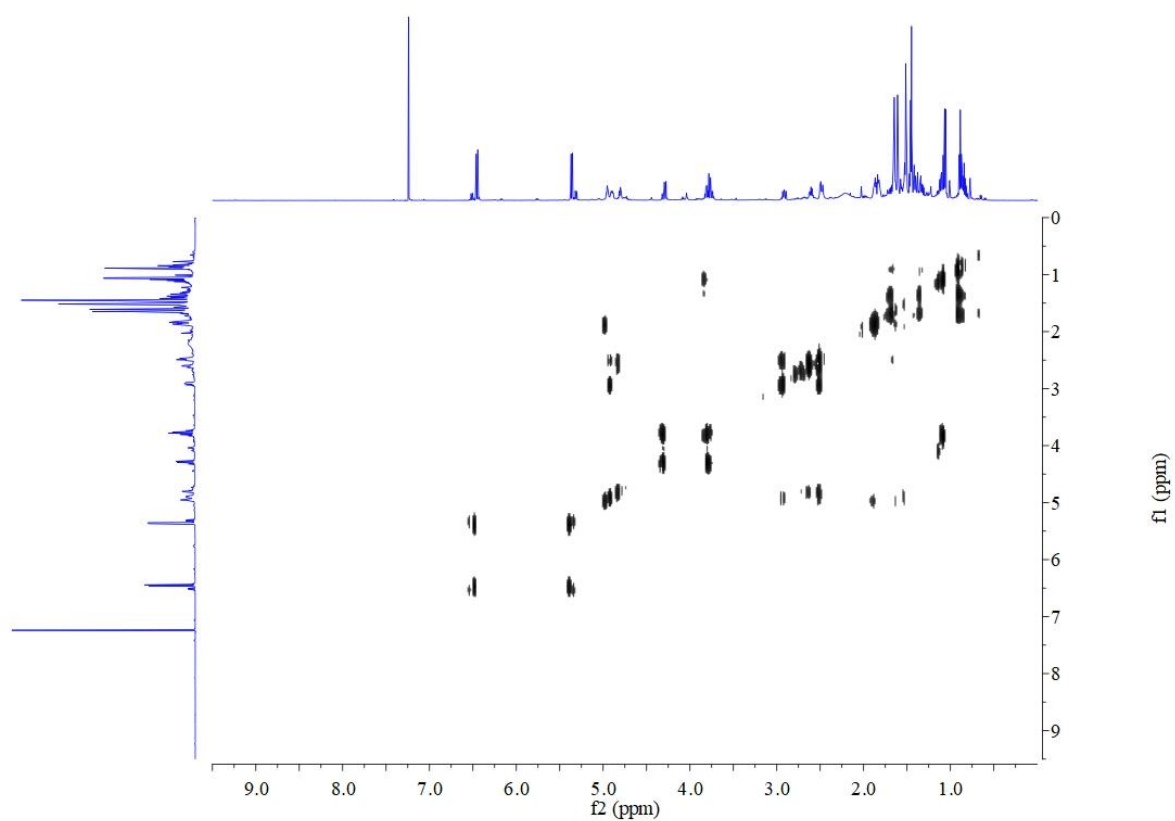

**Figure S13.**  $^1\text{H}$ - $^1\text{H}$  COSY spectrum for Garxanthochin B in  $\text{CDCl}_3$ .

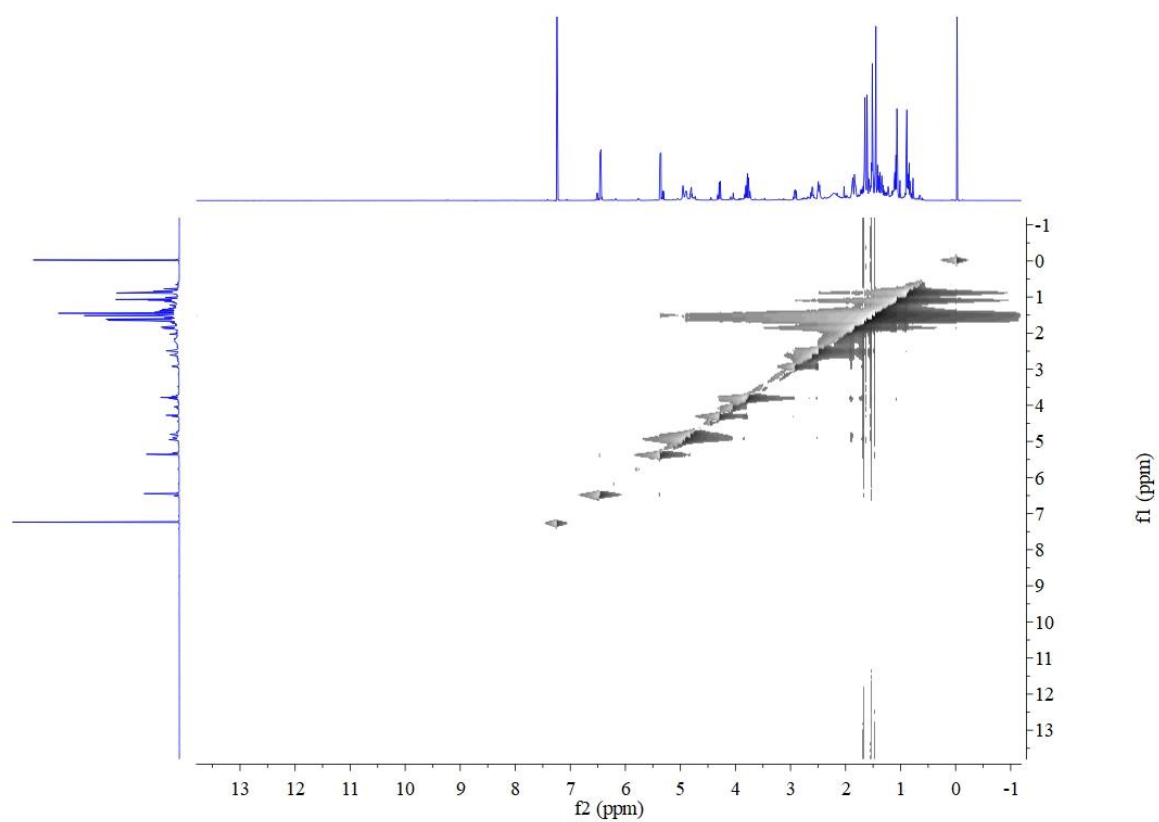

**Figure S14.** NOESY spectrum for Garxanthochin B in  $\text{CDCl}_3$ .

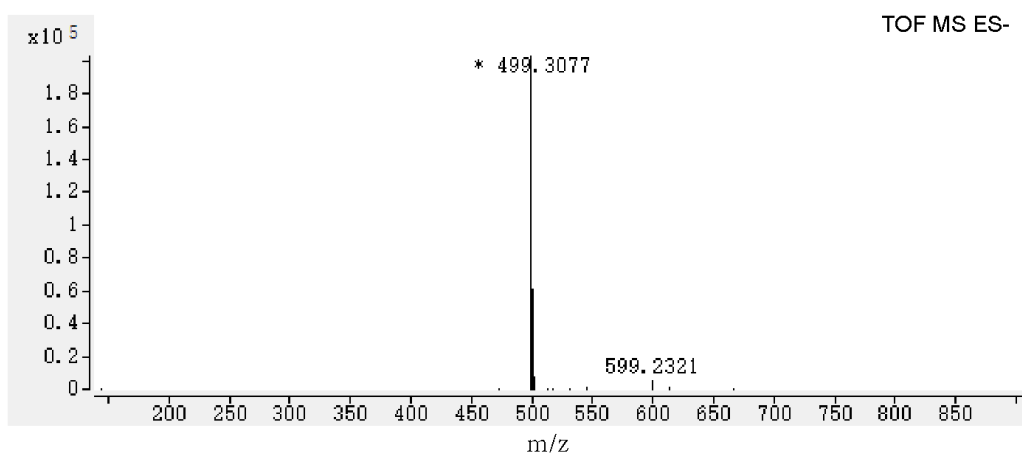

**Figure S15.** HR-ESI-MS spectrum for Garxanthochin C.

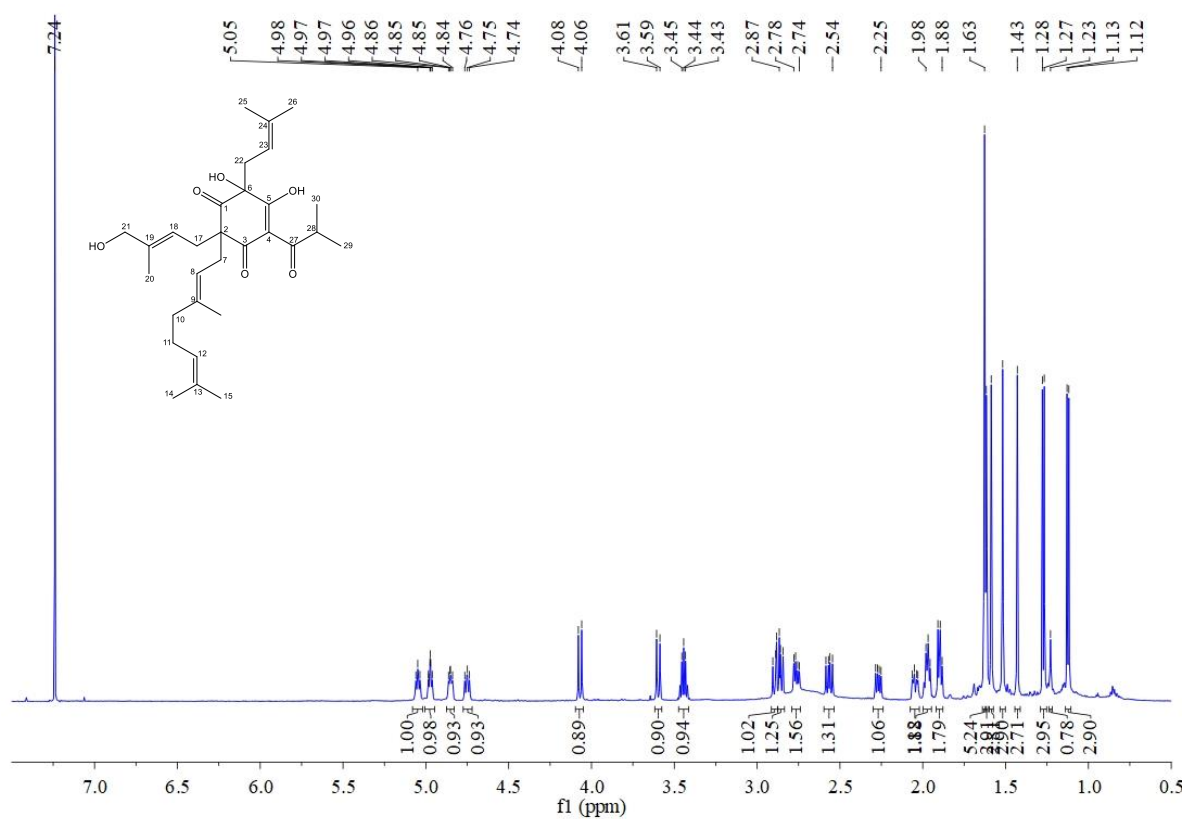

**Figure S16.**  $^1\text{H}$  NMR spectrum for Garxanthochin C in  $\text{CDCl}_3$  (600 MHz).

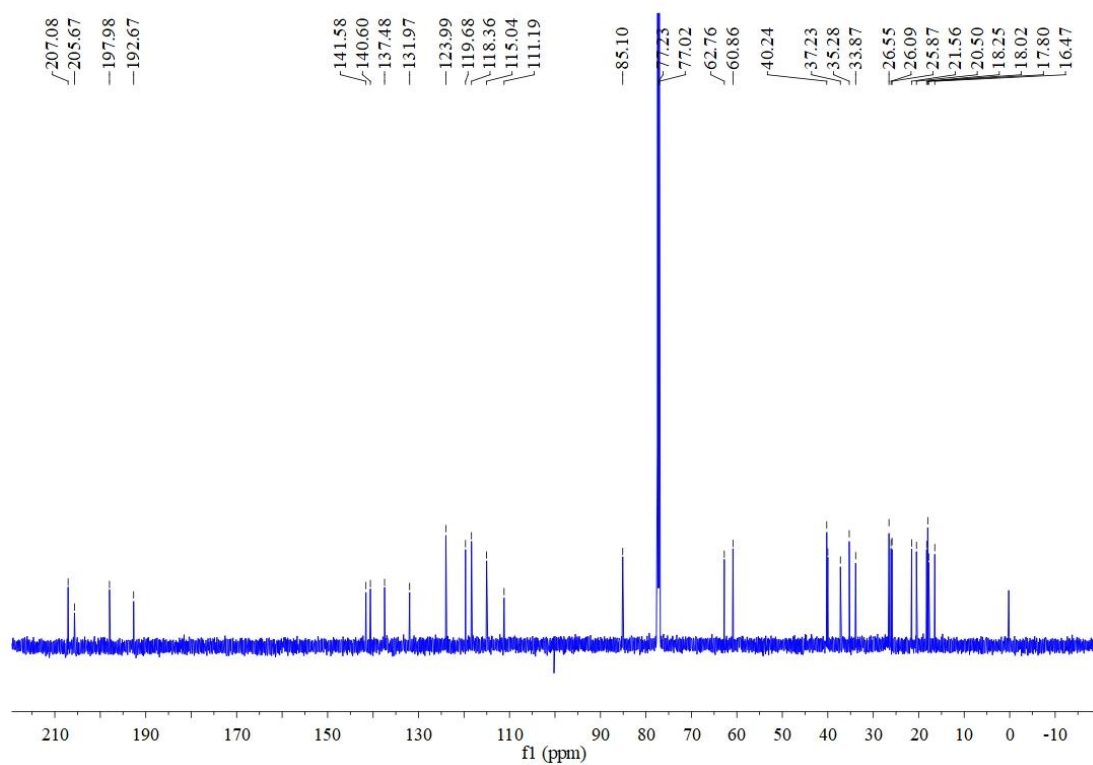

**Figure S17.**  $^{13}\text{C}$  NMR spectrum for Garxanthochin C in  $\text{CDCl}_3$  (150 MHz).

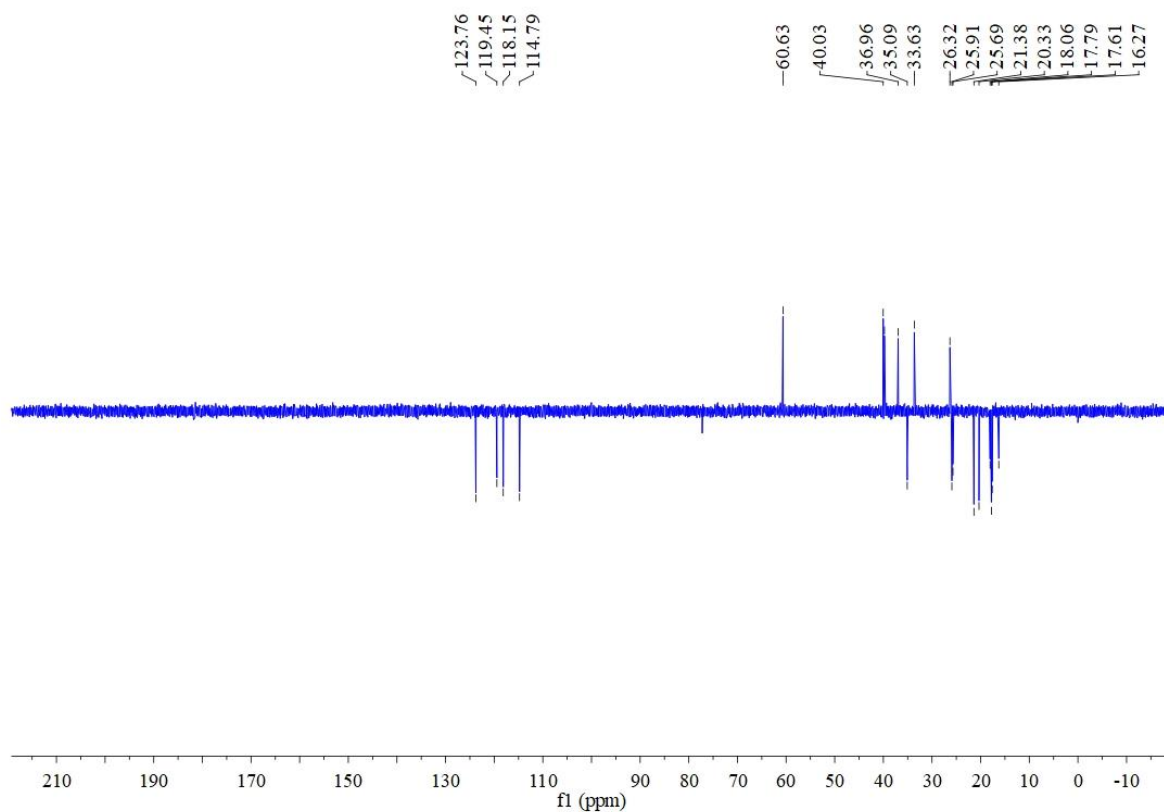

**Figure S18.** DEPT NMR spectrum for Garxanthochin C in  $\text{CDCl}_3$  (150 MHz).

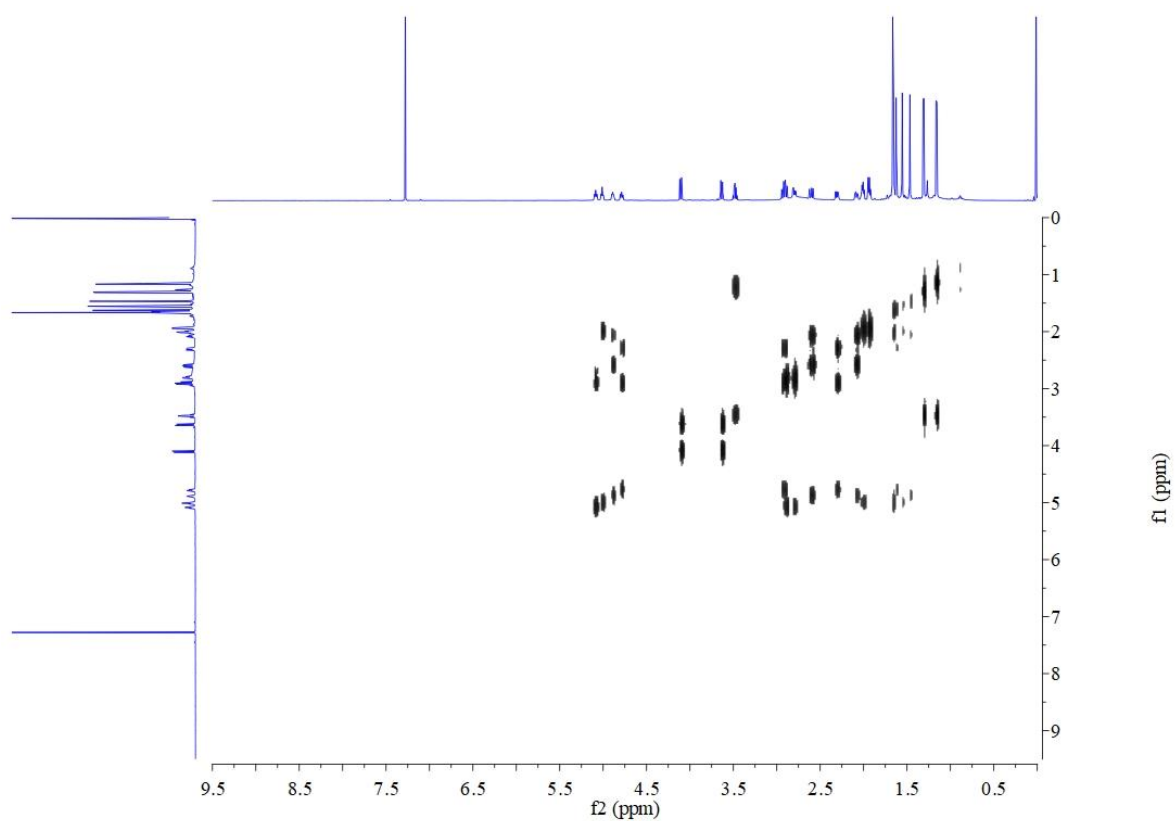

**Figure S19.**  $^1\text{H}$ - $^1\text{H}$  COSY spectrum for Garxanthochin C in  $\text{CDCl}_3$ .

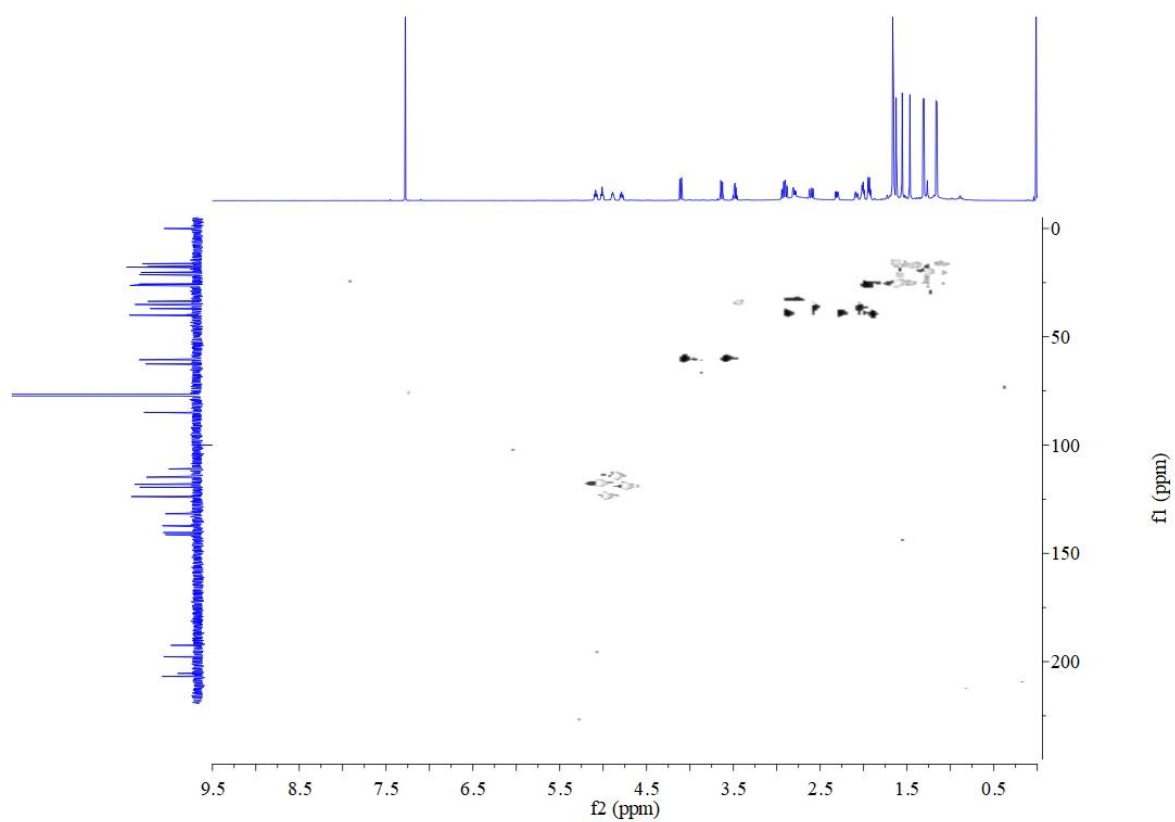

**Figure S20.** HMQC spectrum for Garxanthochin C in  $\text{CDCl}_3$ .

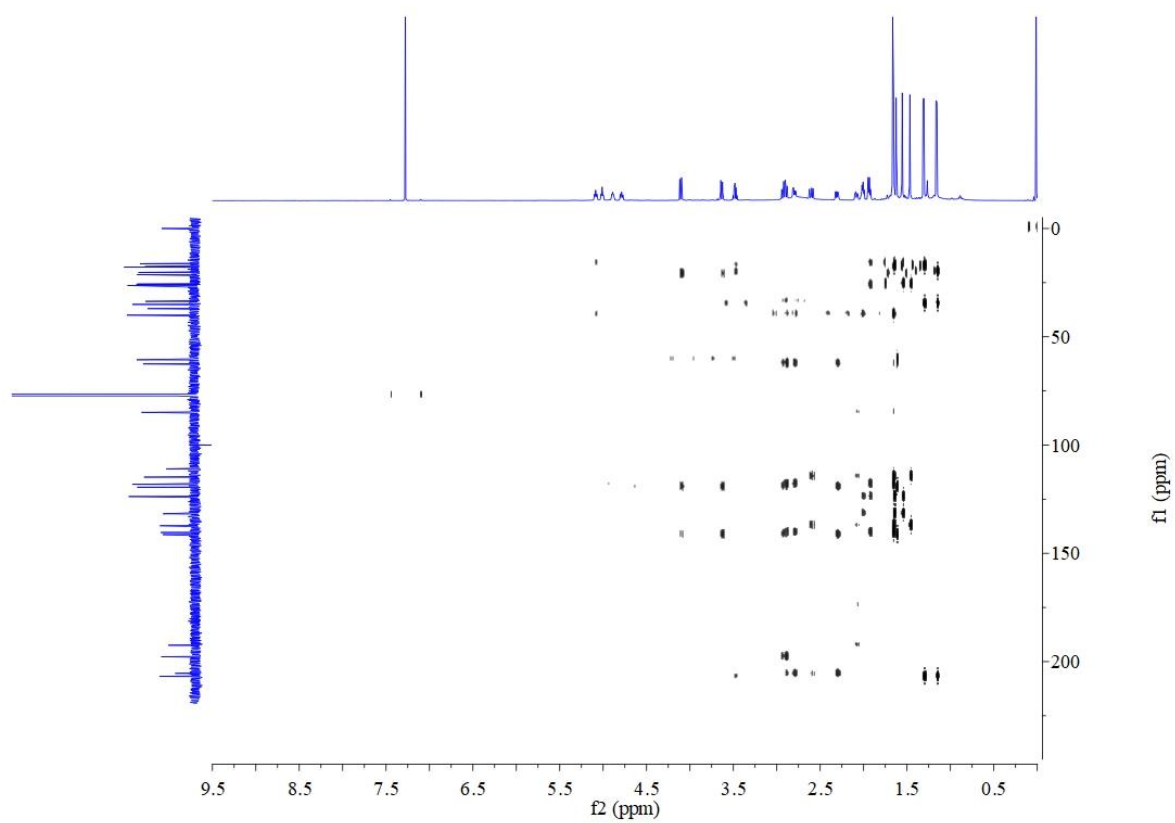

**Figure S21.** HMBC spectrum for Garxanthochin C in  $\text{CDCl}_3$ .
